# Supplementary material for: Do orthologous gene phylogenies really support tree-thinking?
Source: Springer Nature journal article supplement (doi:10.1186/1471-2148-5-33), 2005-05-24
Supplement: 12862_2005_145_MOESM4_ESM.pdf [file 12862_2005_145_MOESM4_ESM.pdf]

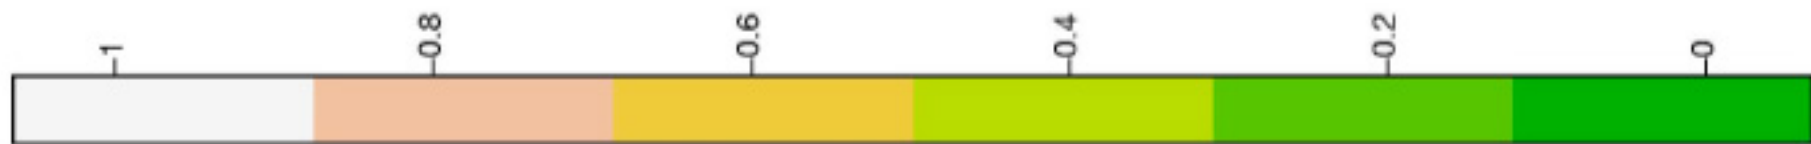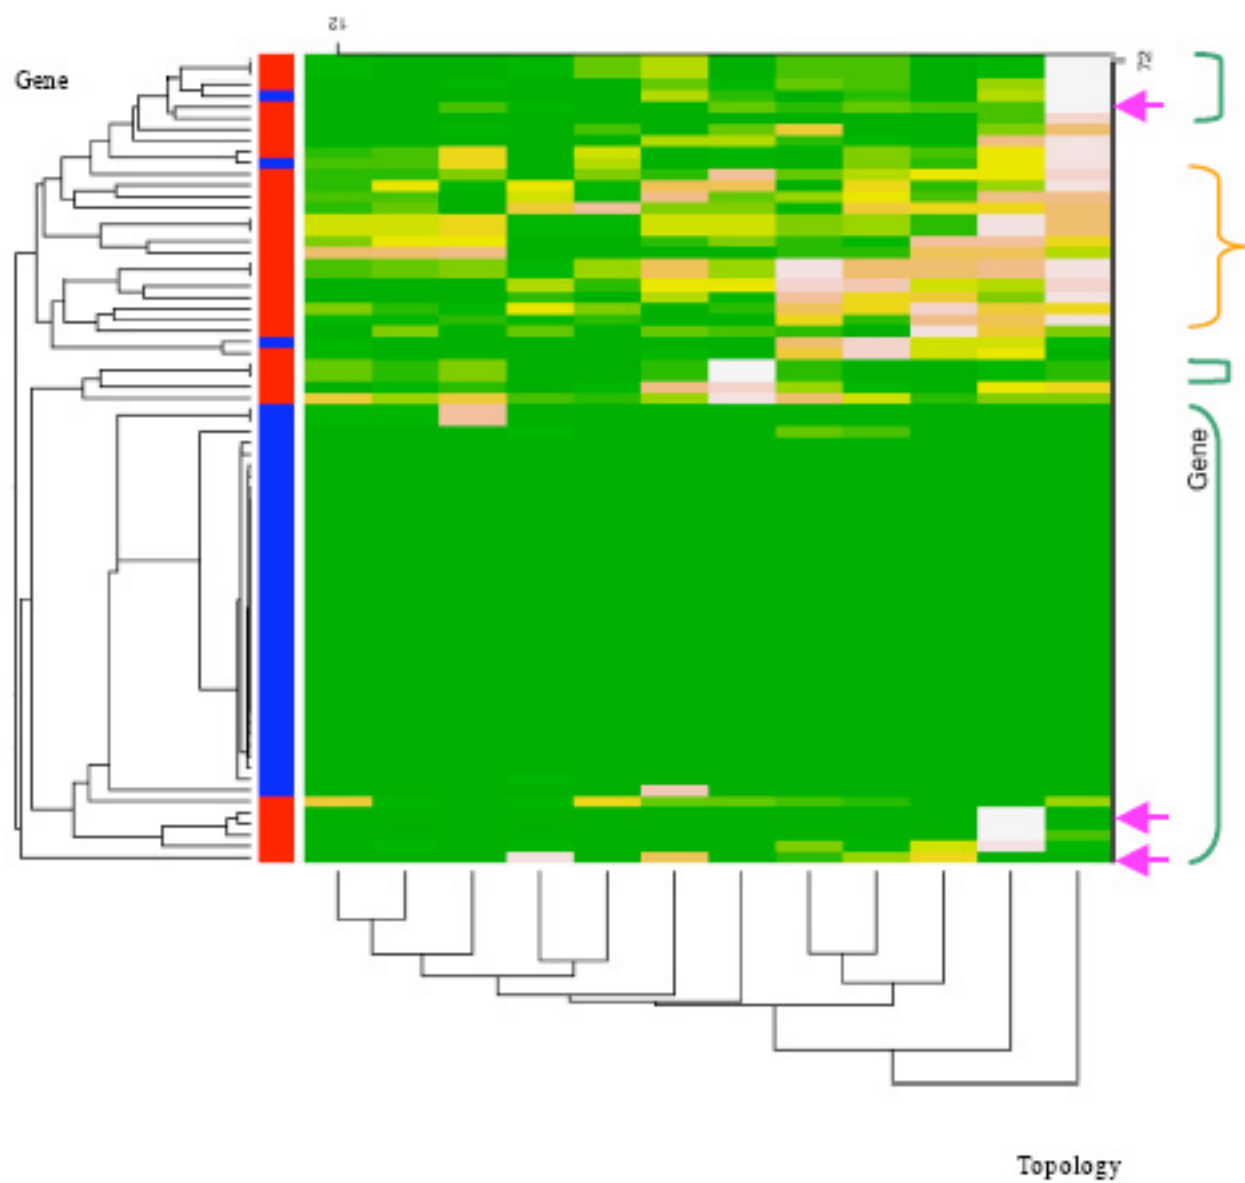

A.

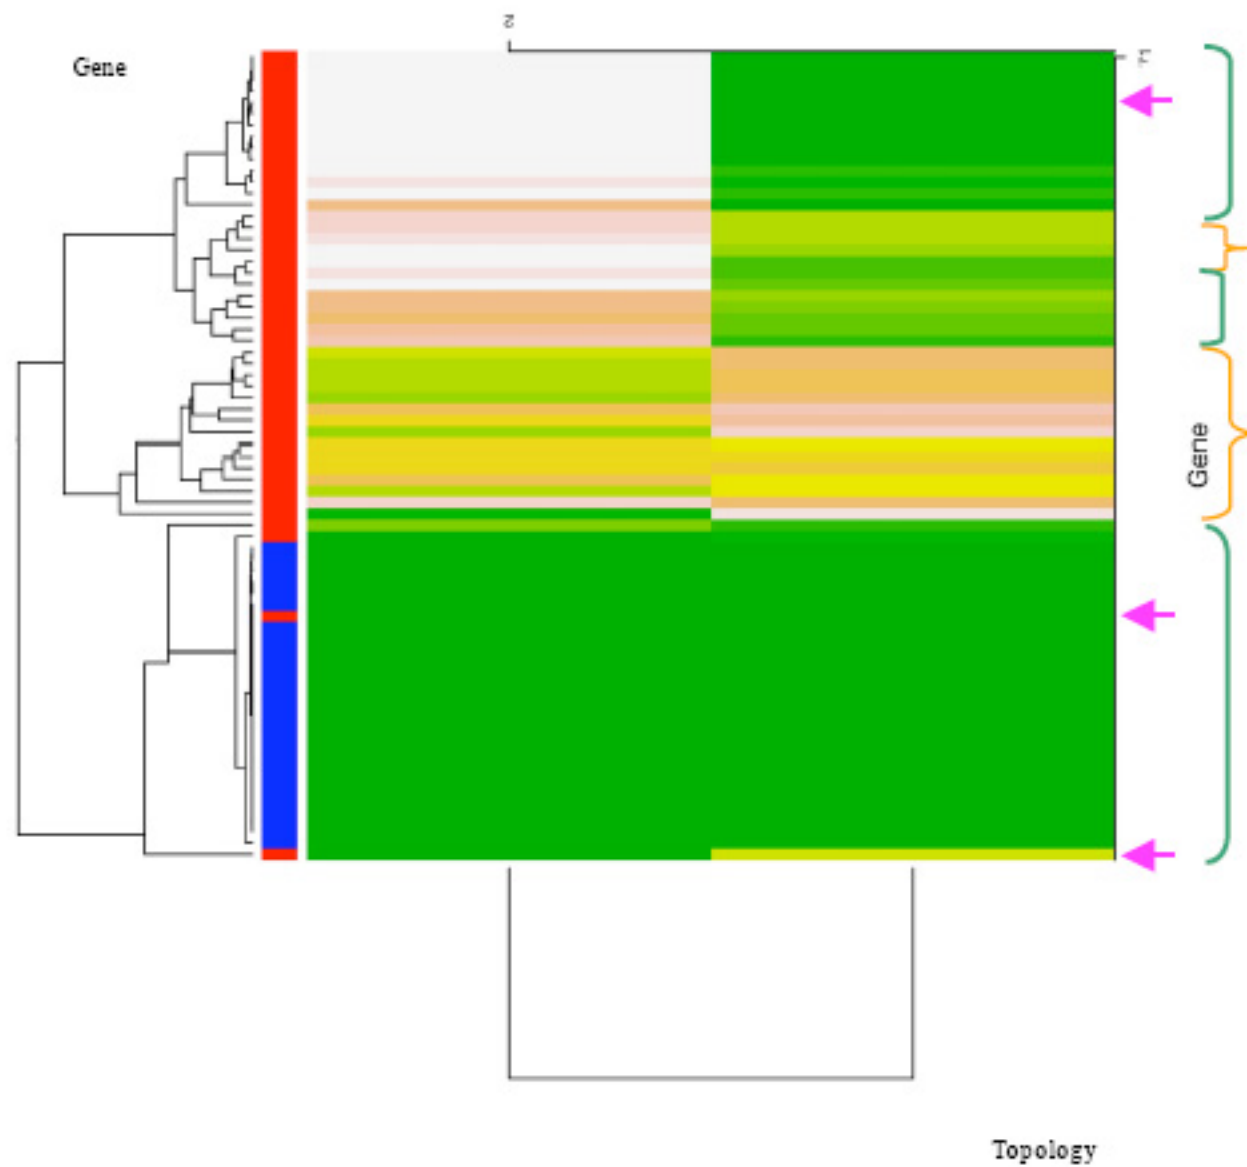

B.
